# Supplementary material
Source: PubMed Central journal article supplement (PMC5432391)
Supplement: NIHMS830348-supplement-Supplemental_Data_File___doc___tif__pdf__etc__.pdf [file NIHMS830348-supplement-Supplemental_Data_File___doc___tif__pdf__etc__.pdf]

*Supplemental Data for*  
**Temporal Response of MicroRNA Expression in Blood Leukocytes from  
Patients with the Acute Respiratory Distress Syndrome**

Purushottam Narute<sup>1</sup>, Nitin Seam<sup>1</sup>, Margaret Tropea<sup>1</sup>, Carolea Logun<sup>1</sup>, Rongman Cai<sup>1</sup>,  
Junfeng Sun<sup>1</sup>, James H Shelhamer<sup>1</sup>, G. Umberto Meduri<sup>2</sup> and Anthony F. Suffredini<sup>1</sup>

<sup>1</sup>Critical Care Medicine Department, Clinical Center,  
National Institutes of Health, Bethesda, MD 20892,

<sup>2</sup>Veterans Affairs Medical Center, Memphis, TN 38104

|          |                       |
|----------|-----------------------|
| Page 2   | Supplemental Table 1  |
| Page 3   | Supplemental Figure 1 |
| Page 4   | Supplemental Figure 2 |
| Page 5-6 | Supplemental Figure 3 |

**Supplemental Table 1. Clinical characteristics of patients with available sequential blood samples for miRNA analysis compared to those without samples.**

| Variables                                              | Patients with buffy coat cells available<br>n = 51 | Patients without buffy coat cells<br>n = 41 | P value |
|--------------------------------------------------------|----------------------------------------------------|---------------------------------------------|---------|
| Age <sup>a</sup>                                       | 50.4 ± 17.4                                        | 52.5 ± 13.0                                 | 0.51    |
| Sex <sup>b</sup> (men/women)                           | 25/26                                              | 23/18                                       | 0.53    |
| APACHE 3 <sup>a</sup>                                  | 60.4 ± 17.7                                        | 62.2 ± 20.4                                 | 0.66    |
| PaO <sub>2</sub> /FiO <sub>2</sub> day 0 <sup>a</sup>  | 117.1 ± 48.8                                       | 124.4 ± 45.9                                | 0.46    |
| WBC <sup>a</sup> (x 10 <sup>3</sup> /mm <sup>3</sup> ) | 15.5 ± 7.3                                         | 15.3 ± 7.5                                  | 0.88    |
| Hospital mortality (%) <sup>b</sup>                    | 12 (23.5)                                          | 15 (36.5)                                   | 0.25    |

Summary data displayed as mean ± sd, a – t-test, b – Fisher's exact test

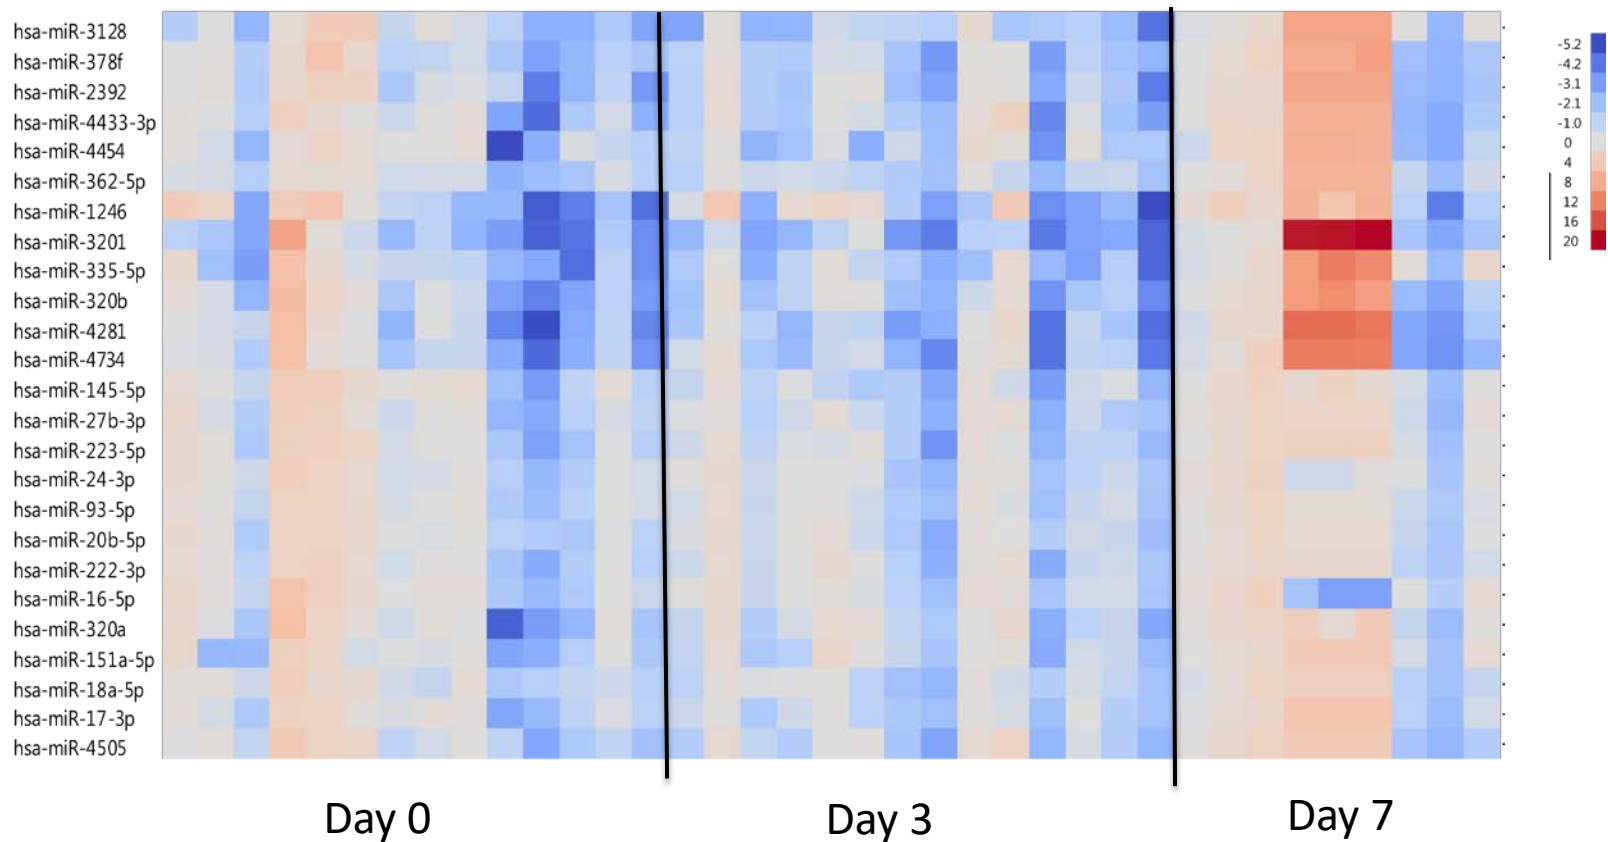

**Supplemental Figure 1. Heat map of miRNA expression evaluated using real-time PCR of blood leukocytes on day 0, 3, and 7 from ARDS patients randomized to placebo/usual.**

Blue color represents downregulation and red represents upregulation. The heat map shows real-time PCR data of miRNA expression from day 0, 3 and 7 of ARDS in 14 patients who received usual care for ARDS. There was no significant change in any of the 25 miRNA when comparing day 0 and day 3. However, by day 7, miRNA expression was upregulated in 14 of 25 miRNA targets at day 7 compared to day 3 or day 0.

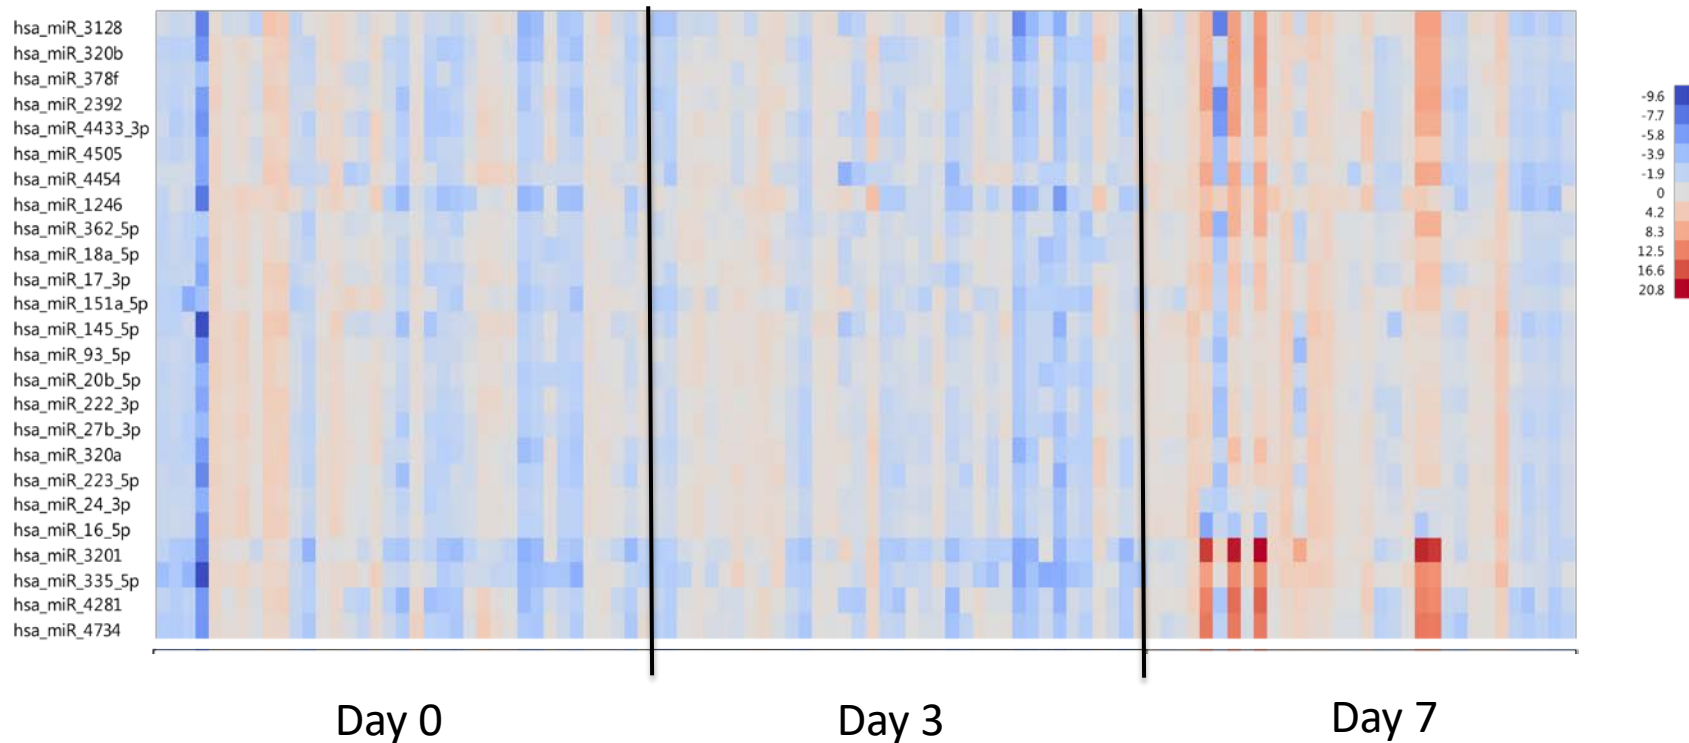

**Supplemental Figure 2. Heat map of miRNA expression evaluated using real-time PCR of blood leukocytes on day 0, 3, and 7 from ARDS patients treated with corticosteroids/usual care.**

Each column represents a patient while each row represents a miRNA as indicated. Blue color represents downregulation and red represents upregulation. The heat map shows real-time PCR data of miRNA expression from day 0, 3 and 7 of ARDS in 37 patients who received corticosteroids for ARDS. There was no significant change in any of the 25 miRNA when comparing day 0 and day 3. However, by day 7, miRNA expression was upregulated in 22 of 25 miRNA targets.

|                                  | Kovach <i>et al</i> (9) | Howrylak <i>et al</i> (10) | Howrylak <i>et al</i> (10) | Kangelaris <i>et al</i> (12) | Kovach <i>et al</i> (1) | Kovach <i>et al</i> (9)<br>Kangelaris <i>et al</i> (12) | Howrylak <i>et al</i> (10) | Kovach <i>et al</i> (9) | Kovach <i>et al</i> (9)<br>Kangelaris <i>et al</i> (12) | Kangelaris <i>et al</i> (12) | Howrylak <i>et al</i> (10) |
|----------------------------------|-------------------------|-------------------------|-------------------------|-------------------------|-------------------------|-------------------------|-------------------------|-------------------------|-------------------------|----------------------------|----------------------------|------------------------------|-------------------------|---------------------------------------------------------|----------------------------|-------------------------|---------------------------------------------------------|------------------------------|----------------------------|
|                                  |                         | AM down                 | AM up                   | AM down                 | AM down                 | AM up                   | AM down                 | AM down                 | AM down                 |                            |                            |                              | AM up                   | AM up                                                   |                            | AM up                   | AM up                                                   |                              |                            |
|                                  | PBL up                  | PBL down                | PBL up                  | PBL down                | PBL down                | PBL up                  | PBL down                | PBL down                | PBL down                | PBL up                     | PBL down                   | PBL down                     | PBL up                  | PBL up                                                  | PBL up                     | PBL up                  | PBL up                                                  | PBL down                     | PBL down                   |
|                                  | CEACAM6                 | CCDC50                  | MRV11                   | RORA                    | SASH1                   | DYSF                    | EPB41L4A                | ICA1L                   | YES1                    | ARF3                       | PNPLA2                     | MME                          | MGAM                    | OLM4                                                    | BTG2                       | CXCR1                   | MMP8                                                    | HCAR3                        | NQO2                       |
| hsa-miR-4505                     | 1015                    | 3040                    | 1207                    |                         | 1466                    | 5334                    | 3599                    | 1619                    | 3191                    | 2093                       | 2060                       | 4366                         | 1253                    | 215                                                     | 2239                       | 1360                    |                                                         | 1038                         | 465                        |
| hsa-miR-4505                     | 226                     | 240                     | 2206                    |                         | 4871                    | 5345                    | 3235                    |                         | 3242                    | 2115                       | 603                        |                              | 2539                    |                                                         | 1152                       |                         | 1049                                                    |                              |                            |
| hsa-miR-4505                     | 3219                    |                         | 2218                    |                         | 5189                    | 4592                    |                         |                         | 3251                    | 1064                       | 43                         |                              |                         |                                                         |                            |                         |                                                         |                              |                            |
| hsa-miR-4505                     | 1082                    |                         |                         |                         |                         |                         |                         |                         |                         |                            |                            |                              |                         |                                                         |                            |                         |                                                         |                              |                            |
| hsa-miR-2392                     | 2056                    | 1510                    | 3629                    | 1437                    | 4867                    | 4248                    | 3408                    |                         | 3257                    | 2097                       |                            | 5185                         | 1416                    | 179                                                     | 1692                       | 2243                    |                                                         | 1038                         |                            |
| hsa-miR-2392                     | 1640                    | 4981                    | 986                     | 3386                    | 5456                    |                         | 3432                    |                         |                         | 1064                       |                            | 4355                         | 2226                    | 216                                                     |                            | 1359                    |                                                         |                              |                            |
| hsa-miR-2392                     |                         |                         | 2117                    | 397                     |                         |                         | 3462                    |                         |                         | 1205                       |                            | 4068                         |                         |                                                         |                            | 1151                    |                                                         |                              |                            |
| hsa-miR-4433-3p                  | 2486                    | 8499                    | 3798                    | 10284                   | 6411                    | 4804                    | 2567                    | 3177                    | 1347                    |                            | 1944                       |                              |                         |                                                         | 123                        | 1394                    | 2651                                                    |                              | 690                        |
| hsa-miR-4433-3p                  | 2050                    | 4755                    | 1202                    | 5690                    | 3420                    |                         |                         |                         | 3261                    |                            | 2308                       |                              | 2220                    |                                                         | 2225                       |                         |                                                         |                              | 698                        |
| hsa-miR-4433-3p                  | 233                     |                         | 2602                    | 391                     | 1166                    |                         |                         |                         | 3311                    |                            | 2324                       |                              |                         |                                                         |                            |                         |                                                         |                              |                            |
| hsa-miR-4433-3p                  |                         |                         |                         |                         |                         |                         |                         |                         | 1412                    |                            |                            |                              |                         |                                                         |                            |                         |                                                         |                              |                            |
| hsa-miR-4734                     | 676                     | 4759                    | 990                     | 436                     | 5501                    | 4594                    | 3424                    | 1446                    | 3198                    | 2084                       | 617                        |                              | 2231                    | 123                                                     |                            |                         | 670                                                     | 1077                         | 467                        |
| hsa-miR-4734                     | 692                     | 3047                    | 1789                    | 7505                    | 3115                    | 6411                    |                         |                         |                         | 2097                       | 666                        |                              |                         |                                                         |                            |                         |                                                         | 1131                         |                            |
| hsa-miR-4734                     | 1719                    | 608                     | 1060                    |                         | 1471                    |                         |                         |                         |                         |                            |                            |                              |                         | 1599                                                    |                            |                         |                                                         | 1114                         |                            |
| hsa-miR-4734                     | 179                     |                         | 2117                    |                         |                         |                         |                         |                         |                         |                            |                            |                              |                         |                                                         |                            |                         |                                                         | 979                          |                            |
| hsa-miR-4734                     | 1868                    |                         |                         |                         |                         |                         |                         |                         |                         |                            |                            |                              |                         |                                                         |                            |                         |                                                         |                              |                            |
| hsa-miR-4281                     |                         |                         | 1775                    |                         |                         | 2390                    | 2592                    | 7714                    | 3287                    |                            |                            | 27                           | 3561                    |                                                         |                            |                         | 1015                                                    |                              | 913                        |
| hsa-miR-4281                     |                         |                         | 2131                    |                         |                         |                         | 3442                    |                         |                         |                            |                            |                              |                         |                                                         |                            |                         | 627                                                     |                              |                            |
| hsa-miR-378f                     | 1088                    | 7624                    |                         | 9915                    |                         | 4646                    |                         | 6678                    |                         |                            |                            |                              |                         | 212                                                     |                            |                         |                                                         |                              |                            |
| hsa-miR-378f                     | 2051                    |                         |                         |                         |                         |                         |                         | 4200                    |                         |                            |                            |                              |                         | 231                                                     |                            |                         |                                                         |                              |                            |
| hsa-miR-18a-5p                   |                         | 7180                    | 2598                    |                         |                         | 4810                    | 3274                    | 4149                    | 1543                    |                            |                            | 4352                         |                         |                                                         | 2393                       |                         |                                                         |                              |                            |
| hsa-miR-27b-3p                   | 587                     |                         | 2136                    |                         | 5229                    |                         | 1120                    |                         |                         |                            |                            | 1169                         |                         | 1886                                                    | 364                        |                         |                                                         |                              |                            |
| hsa-miR-27b-3p                   |                         |                         |                         |                         |                         |                         |                         |                         |                         |                            |                            |                              |                         |                                                         |                            |                         |                                                         |                              |                            |
| hsa-miR-145-5p                   |                         |                         | 2083                    |                         |                         | 717                     |                         |                         |                         |                            |                            |                              | 2967                    |                                                         |                            |                         |                                                         |                              | 707                        |
| hsa-miR-145-5p                   |                         |                         |                         |                         |                         | 5926                    |                         |                         |                         |                            |                            |                              |                         |                                                         |                            |                         |                                                         |                              |                            |
| hsa-miR-151a-5p                  | 52                      |                         |                         |                         | 3267                    | 4782                    | 3502                    |                         |                         |                            |                            |                              |                         |                                                         |                            |                         |                                                         |                              | 701                        |
| hsa-miR-320b                     |                         | 405                     |                         | 5662                    |                         |                         |                         | 1357                    |                         | 1201                       |                            |                              |                         |                                                         |                            | 1357                    | 654                                                     |                              |                            |
| hsa-miR-320b                     |                         | 5895                    |                         | 8233                    |                         |                         |                         |                         |                         |                            |                            |                              |                         |                                                         |                            |                         |                                                         |                              |                            |
| hsa-miR-320b                     |                         | 3307                    |                         |                         |                         |                         |                         |                         |                         |                            |                            |                              |                         |                                                         |                            |                         |                                                         |                              |                            |
| hsa-miR-320a                     |                         | 5895                    |                         | 5662                    |                         |                         |                         | 1357                    |                         | 1201                       |                            |                              |                         |                                                         |                            | 1357                    | 654                                                     |                              |                            |
| hsa-miR-320a                     |                         | 3307                    |                         | 8233                    |                         |                         |                         |                         |                         |                            |                            |                              |                         |                                                         |                            |                         |                                                         |                              |                            |
| hsa-miR-4454                     |                         |                         |                         | 6867                    |                         |                         | 2590                    |                         |                         |                            |                            |                              |                         |                                                         | 2391                       |                         |                                                         |                              |                            |
| hsa-miR-1246                     |                         |                         |                         |                         | 3403                    | 5889                    |                         |                         |                         |                            |                            | 8                            |                         |                                                         |                            |                         |                                                         |                              |                            |
| hsa-miR-1246                     |                         |                         |                         |                         | 3131                    |                         |                         |                         |                         |                            |                            |                              |                         |                                                         |                            |                         |                                                         |                              |                            |
| hsa-miR-1246                     |                         |                         |                         |                         | 5179                    |                         |                         |                         |                         |                            |                            |                              |                         |                                                         |                            |                         |                                                         |                              |                            |
| hsa-miR-17-3p                    | 676                     |                         |                         |                         |                         |                         |                         |                         |                         |                            |                            |                              |                         |                                                         |                            |                         | 206                                                     |                              |                            |
| hsa-miR-17-3p                    | 1717                    |                         |                         |                         |                         |                         |                         |                         |                         |                            |                            |                              |                         |                                                         |                            |                         |                                                         |                              |                            |
| hsa-miR-17-3p                    | 1714                    |                         |                         |                         |                         |                         |                         |                         |                         |                            |                            |                              |                         |                                                         |                            |                         |                                                         |                              |                            |
| hsa-miR-20b-5p                   |                         |                         |                         |                         |                         |                         |                         | 4149                    |                         |                            | 2067                       |                              |                         |                                                         |                            |                         |                                                         |                              |                            |
| hsa-miR-20b-5p                   |                         |                         |                         |                         |                         |                         |                         |                         |                         |                            | 1951                       |                              |                         |                                                         |                            |                         |                                                         |                              |                            |
| hsa-miR-3128                     |                         | 966                     |                         |                         |                         |                         | 1147                    | 4873                    |                         |                            |                            |                              |                         |                                                         |                            |                         |                                                         |                              |                            |
| hsa-miR-335-5p                   |                         | 4747                    |                         |                         |                         |                         |                         |                         |                         |                            |                            |                              |                         |                                                         |                            |                         |                                                         |                              |                            |
| hsa-miR-335-5p                   |                         | 4752                    |                         |                         |                         |                         |                         |                         |                         |                            |                            |                              |                         |                                                         |                            |                         |                                                         |                              |                            |
| hsa-miR-3201                     |                         |                         |                         |                         |                         |                         |                         |                         |                         |                            |                            | 4393                         |                         |                                                         |                            |                         |                                                         |                              |                            |
| hsa-miR-223-5p                   |                         |                         |                         |                         |                         |                         |                         |                         |                         |                            |                            |                              |                         |                                                         |                            |                         |                                                         |                              |                            |
| number of binding sites per mRNA | 21                      | 19                      | 18                      | 17                      | 16                      | 14                      | 14                      | 11                      | 11                      | 10                         | 10                         | 9                            | 9                       | 8                                                       | 8                          | 8                       | 7                                                       | 7                            | 7                          |

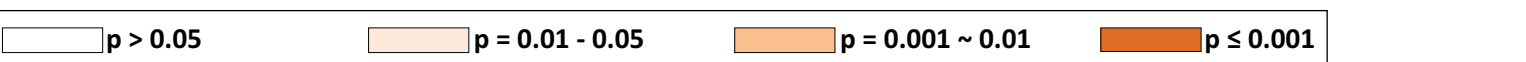

|                         | Kovach <i>et al</i> (9) | Kangelaris <i>et al</i> (12) | Howrylak <i>et al</i> (10) | Howrylak <i>et al</i> (10) | Kovach <i>et al</i> (9) | Howrylak <i>et al</i> (10) | Kangelaris <i>et al</i> (12) | Kovach <i>et al</i> (9) | Narute <i>et al.</i> | Dolinay <i>et al</i> (11) | Kovach <i>et al</i> (9) | Dolinay <i>et al</i> (11) | Kangelaris <i>et al</i> (12) | Howrylak <i>et al</i> (10) | Kovach <i>et al</i> (9) |
|-------------------------|-------------------------|------------------------------|----------------------------|----------------------------|-------------------------|----------------------------|------------------------------|-------------------------|----------------------|---------------------------|-------------------------|---------------------------|------------------------------|------------------------------|------------------------------|------------------------------|----------------------------|-------------------------|
|                         | AM down                 |                              |                            |                            | AM up                   |                            |                              | AM down                 |                      |                           |                         |                           |                              |                              |                              |                              |                            |                         |
|                         | PBL down                | PBL up                       | PBL up                     | PBL down                   | PBL up                  | PBL up                     | PBL down                     | PBL up                  | PBL up               | PBL up                    | PBL up                  | PBL up                    | PBL up                       | PBL up                       | PBL up                       | PBL down                     | PBL down                   | PBL up                  |
|                         | ZNF124                  | LCN2                         | CDKN1A                     | NPEPL1                     | CD177                   | FTH1 (ferritin)            | CNTNAP3                      | ENPP5                   | NFKB (p65)           | IL-18                     | IL-1R2                  | CASP1                     | CD24                         | RETN                         | TCN1                         | RBP7                         | CREBZF                     | ANXA3                   |
| hsa-miR-4505            | 2030                    | 34                           | 1899                       | 2051                       | 1471                    |                            | 3364                         |                         |                      | 890                       |                         |                           |                              |                              |                              |                              |                            |                         |
| hsa-miR-4505            | 1958                    |                              | 1647                       | 137                        |                         |                            |                              |                         |                      |                           |                         |                           |                              |                              |                              |                              |                            |                         |
| hsa-miR-4505            |                         |                              | 1709                       |                            |                         |                            |                              |                         |                      |                           |                         |                           |                              |                              |                              |                              |                            |                         |
| hsa-miR-4505            |                         |                              |                            |                            |                         |                            |                              |                         |                      |                           |                         |                           |                              |                              |                              |                              |                            |                         |
| hsa-miR-2392            |                         | 348                          | 1698                       |                            | 979                     |                            |                              |                         |                      |                           | 1026                    | 402                       |                              | 62                           | 953                          |                              |                            | 426                     |
| hsa-miR-2392            |                         |                              |                            |                            | 1453                    |                            |                              |                         |                      |                           |                         |                           |                              |                              |                              |                              |                            |                         |
| hsa-miR-2392            |                         |                              |                            |                            |                         |                            |                              |                         |                      |                           |                         |                           |                              |                              |                              |                              |                            |                         |
| hsa-miR-4433-3p         | 1989                    | 350                          |                            | 1971                       |                         | 608                        | 6260                         | 143                     |                      |                           |                         |                           |                              |                              |                              |                              |                            |                         |
| hsa-miR-4433-3p         | 2039                    |                              |                            | 1403                       |                         |                            |                              |                         |                      |                           |                         |                           |                              |                              |                              |                              |                            |                         |
| hsa-miR-4433-3p         |                         |                              |                            |                            |                         |                            |                              |                         |                      |                           |                         |                           |                              |                              |                              |                              |                            |                         |
| hsa-miR-4433-3p         |                         |                              |                            |                            |                         |                            |                              |                         |                      |                           |                         |                           |                              |                              |                              |                              |                            |                         |
| hsa-miR-4734            |                         | 742                          |                            |                            |                         |                            |                              |                         |                      |                           |                         |                           |                              |                              |                              | 460                          |                            |                         |
| hsa-miR-4734            |                         |                              |                            |                            |                         |                            |                              |                         |                      |                           |                         |                           |                              |                              |                              |                              |                            |                         |
| hsa-miR-4734            |                         |                              |                            |                            |                         |                            |                              |                         |                      |                           |                         |                           |                              |                              |                              |                              |                            |                         |
| hsa-miR-4734            |                         |                              |                            |                            |                         |                            |                              |                         |                      |                           |                         |                           |                              |                              |                              |                              |                            |                         |
| hsa-miR-4734            |                         |                              |                            |                            |                         |                            |                              |                         |                      |                           |                         |                           |                              |                              |                              |                              |                            |                         |
| hsa-miR-4281            | 2003                    | 147                          |                            |                            | 847                     | 616                        |                              |                         |                      |                           |                         |                           |                              |                              |                              |                              |                            |                         |
| hsa-miR-4281            |                         |                              |                            |                            |                         | 731                        |                              |                         |                      |                           |                         |                           |                              |                              |                              |                              |                            |                         |
| hsa-miR-378f            |                         |                              |                            |                            |                         | 1010                       |                              |                         |                      | 885                       |                         |                           | 1415                         |                              |                              |                              |                            |                         |
| hsa-miR-378f            |                         |                              |                            |                            |                         |                            |                              |                         |                      |                           |                         |                           |                              |                              |                              |                              |                            |                         |
| hsa-miR-18a-5p          | 817                     |                              |                            |                            |                         |                            |                              |                         |                      |                           |                         |                           |                              |                              |                              |                              |                            |                         |
| hsa-miR-27b-3p          |                         |                              |                            | 2052                       |                         |                            | 1256                         |                         |                      |                           |                         |                           |                              |                              |                              |                              |                            |                         |
| hsa-miR-27b-3p          |                         |                              |                            |                            |                         |                            | 483                          |                         |                      |                           |                         |                           |                              |                              |                              |                              |                            |                         |
| hsa-miR-145-5p          | 1999                    |                              | 1294                       |                            |                         |                            |                              |                         |                      |                           | 740                     |                           |                              |                              |                              |                              |                            |                         |
| hsa-miR-145-5p          |                         |                              |                            |                            |                         |                            |                              |                         |                      |                           |                         |                           |                              |                              |                              |                              |                            |                         |
| hsa-miR-151a-5p         |                         |                              |                            |                            | 432                     |                            |                              | 276                     |                      |                           |                         |                           |                              |                              |                              |                              |                            |                         |
| hsa-miR-320b            |                         |                              |                            |                            |                         |                            |                              |                         |                      |                           |                         |                           |                              |                              |                              |                              |                            |                         |
| hsa-miR-320b            |                         |                              |                            |                            |                         |                            |                              |                         |                      |                           |                         |                           |                              |                              |                              |                              |                            |                         |
| hsa-miR-320b            |                         |                              |                            |                            |                         |                            |                              |                         |                      |                           |                         |                           |                              |                              |                              |                              |                            |                         |
| hsa-miR-320a            |                         |                              |                            |                            |                         |                            |                              |                         |                      |                           |                         |                           |                              |                              |                              |                              |                            |                         |
| hsa-miR-320a            |                         |                              |                            |                            |                         |                            |                              |                         |                      |                           |                         |                           |                              |                              |                              |                              |                            |                         |
| hsa-miR-4454            |                         |                              |                            |                            |                         |                            |                              |                         |                      |                           |                         |                           |                              |                              |                              |                              | 3465                       |                         |
| hsa-miR-1246            |                         |                              |                            |                            |                         |                            |                              |                         |                      |                           |                         |                           |                              |                              |                              |                              |                            |                         |
| hsa-miR-1246            |                         |                              |                            |                            |                         |                            |                              |                         |                      |                           |                         |                           |                              |                              |                              |                              |                            |                         |
| hsa-miR-1246            |                         |                              |                            |                            |                         |                            |                              |                         |                      |                           |                         |                           |                              |                              |                              |                              |                            |                         |
| hsa-miR-17-3p           |                         |                              |                            |                            |                         |                            |                              |                         | 204                  |                           |                         |                           |                              |                              |                              |                              |                            |                         |
| hsa-miR-17-3p           |                         |                              |                            |                            |                         |                            |                              |                         |                      |                           |                         |                           |                              |                              |                              |                              |                            |                         |
| hsa-miR-17-3p           |                         |                              |                            |                            |                         |                            |                              |                         |                      |                           |                         |                           |                              |                              |                              |                              |                            |                         |
| hsa-miR-20b-5p          |                         |                              |                            |                            |                         |                            |                              | 272                     |                      |                           |                         |                           |                              |                              |                              |                              |                            |                         |
| hsa-miR-20b-5p          |                         |                              |                            |                            |                         |                            |                              |                         |                      |                           |                         |                           |                              |                              |                              |                              |                            |                         |
| hsa-miR-3128            |                         |                              |                            |                            |                         |                            |                              |                         |                      |                           |                         |                           |                              |                              |                              |                              |                            |                         |
| hsa-miR-335-5p          |                         |                              |                            |                            |                         |                            |                              |                         |                      |                           |                         |                           |                              |                              |                              |                              |                            |                         |
| hsa-miR-335-5p          |                         |                              |                            |                            |                         |                            |                              |                         |                      |                           |                         |                           |                              |                              |                              |                              |                            |                         |
| hsa-miR-3201            |                         |                              |                            |                            |                         |                            |                              |                         |                      |                           |                         |                           |                              |                              |                              |                              |                            |                         |
| hsa-miR-223-5p          |                         |                              |                            |                            |                         |                            |                              | 198                     |                      |                           |                         |                           |                              |                              |                              |                              |                            |                         |
| number of binding sites |                         |                              |                            |                            |                         |                            |                              |                         |                      |                           |                         |                           |                              |                              |                              |                              |                            |                         |
| per mRNA                | 7                       | 6                            | 5                          | 5                          | 5                       | 4                          | 4                            | 3                       | 2                    | 2                         | 2                       | 1                         | 1                            | 1                            | 1                            | 1                            | 1                          | 1                       |

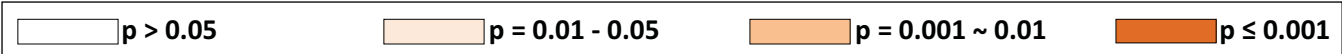

**Supplemental Figure 3: miRNA heterodimer formation with leukocyte mRNA described in prior studies of patients with ARDS.**

Messenger RNA found in either peripheral blood leukocytes (PBL) or alveolar macrophages (AM) described in previous reports of ARDS (6 – 9) patients are listed across the top of the figure. MiRNA that were significantly upregulated at day 7 compared to baseline values are listed in the first column. A pattern-based methodology was used to identify putative miRNA binding sites and the corresponding heteroduplex formation (23). The number within the cell is related to the binding location to the leftmost position of the predicted target site. Nominal p values are provided with the binding location on the mRNA (p > 0.05 – blank, p = 0.01 - 0.05 light orange, p = 0.001 ~ 0.01 orange, p = < 0.001 dark orange). Heteroduplexes were not found for the following mRNA: IL-1beta, SNORD1A, SNORD64, S100A12, IMMP2L, CEACAM, UPAR, VEGF A, VEGF C, NFKB50.

Gene Abbreviations: ANXA3 - Annexin A3, ARF3 - ADP ribosylation factor 3, BTG2 - BTG family member 2, CASP1 - Caspase 1, CCDC50 - Coiled coil domain containing protein 50, CD177 - CD177 molecule, CD24 - CD24 molecule, CDKN1A - Cyclin-dependent kinase inhibitor 1A, CEACAM1 - Carcinoembryonic Antigen-Related Cell Adhesion Molecule 1, CEACAM6 - Carcinoembryonic antigen-related cell adhesion molecule 6, CNTNAP3 - Contactin associated protein-like 3, CREBZF - CREB/ATF bZIP transcription factor, CXCR1 - Chemokine (C-X-C motif) receptor 1, DYSF – Dysferlin, ENPP5 - Ectonucleotide pyrophosphatase/phosphodiesterase 5, EPB41L4A - Erythrocyte membrane protein band 4.1 like 4A, FTH1 - Ferritin, heavy polypeptide 1, HCAR3 - Hydroxycarboxylic acid receptor 3, ICA1L - Islet cell autoantigen 1 like, IL-18 - Interleukin -18, IL-1b - Interleukin 1b, IL-1R2 - Interleukin 1 receptor, type 2, IMMP2L - Inner Mitochondrial Membrane Peptidase Subunit 2, LCN2 - Lipocalin2, MGAM - Maltase-glucoamylase, MME - Membrane metallo-endopeptidase, MMP8 - Matrix metalloproteinase 8, MRV1 - Murine retrovirus integration site 1 homolog, NFKB(p65) - Nuclear Factor NF-Kappa-B P65 Subunit, NFKB50 - Nuclear Factor of Kappa Light Polyprotein Gene Enhancer in B-Cells 1, NPEP - Aminopeptidase-like 1, NQO2, - NAD(P)H dehydrogenase, quinone 2, OLM4 - Olfactomedin 4, PNPLA2 - Patatin like phospholipase domain containing 2, RBP7 - Retinol binding protein 7, RETN – Resistin, RORA - Retinoid-related orphan receptor alpha gene, S100A12 - S100 Calcium Binding Protein A12, SASH1 - SAM- and SH3-domain containing 1 gene, SNORD1A - Small Nucleolar RNA, C/D Box 1A, SNORD64 - Small Nucleolar RNA, C/D Box 64, TCN1 - Transcobalamin 1, UPAR - Plasminogen Activator, Urokinase Receptor, VEGF A - Vascular Endothelial Growth Factor A, VEGF C - Vascular Endothelial Growth Factor C, YES1 - YES proto-oncogene 1, Src family tyrosine kinase, ZNF124 - Zinc finger protein 124
